# Supplementary material for: Accelerated epigenetic aging as a risk factor for chronic obstructive pulmonary disease and decreased lung function in two prospective cohort studies
Source: publisher site journal article supplement (doi:10.18632/aging.103784), 2020-08-03
Supplement: Supplementary file [file aging-v12i16-103784-supplementary-material-SD1.pdf]

## SUPPLEMENTARY FIGURE

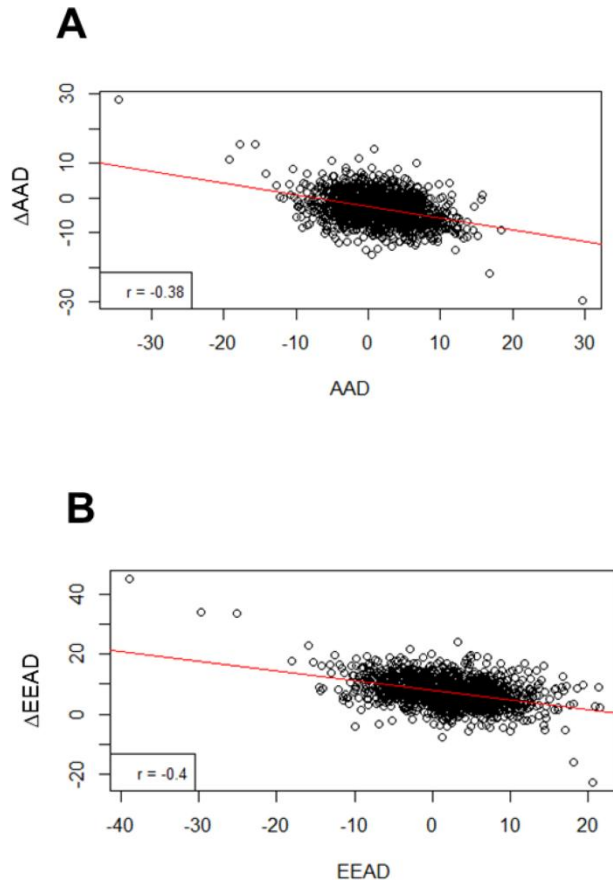

**Supplementary Figure 1. Scatterplot and Pearson correlation coefficient.** AAD and EEAD have a negative Pearson correlation ( $r$ ) with  $\Delta$ AAD (A) and  $\Delta$ EEAD (B) respectively. AAD = age acceleration difference; EEAD = extrinsic epigenetic age acceleration difference;  $\Delta$ AAD = change in age acceleration difference between baseline and follow-up examinations;  $\Delta$ EEAD = change in extrinsic epigenetic age acceleration difference between baseline and follow-up.
