# Supplementary material for: Accelerated epigenetic aging as a risk factor for chronic obstructive pulmonary disease and decreased lung function in two prospective cohort studies
Source: publisher site journal article supplement (doi:10.18632/aging.103784), 2020-08-03
Supplement: Supplementary file [file aging-v12i16-103784-supplementary-material-SD2.pdf]

## SUPPLEMENTARY TABLES

Supplementary Table 1. Clinical covariates.

| N = 408                  | Baseline     | Follow-up    |
|--------------------------|--------------|--------------|
|                          | Mean (SD)    | Mean (SD)    |
| Age (yr)                 | 71.3 (6.36)  | 77.6 (6.52)  |
| Follow-up time (yr)      | -            | 6.26 (3.33)  |
| Weight (kg)              | 85.5 (14.1)  | 83.4 (14.5)  |
| Height (cm)              | 173.9 (6.81) | 173.3 (7.06) |
| BMI (kg/m <sup>2</sup> ) | 28.2 (4.03)  | 27.7 (4.17)  |
| DNAmAge (yr)             | 72.1 (7.07)  | 75.5 (7.00)  |
| EEAA (yr)                | 4.81 (5.62)  | 4.02 (7.78)  |
| AAD (yr)                 | 0.77 (5.41)  | -2.02 (7.72) |
| EEAD (yr)                | 4.81 (5.62)  | 4.02 (7.78)  |
| FVC (liter)              | 3.39 (0.66)  | 3.37 (0.71)  |
| FEV1 (liter)             | 2.57 (0.58)  | 2.48 (0.59)  |
| FEF25-75 (liter/s)       | 4.24 (1.83)  | 3.54 (1.53)  |
| FEV1/FVC                 | 0.76 (0.07)  | 0.74 (0.07)  |
| Binary Variables         | N (%)        | N (%)        |
| Female                   | <b>0 (0)</b> | <b>0 (0)</b> |
| COPD GOLD (Incidence)    | -            | 0 (0)        |
| COPD GLI (Incidence)     | -            | 15 (3.68)    |
| White                    | 399 (97.8)   | 399 (97.8)   |
| Black                    | 5 (1.23)     | 5 (1.23)     |
| Hispanic                 | 4 (0.98)     | 4 (0.98)     |
| Ex-smoker                | 260 (63.7)   | 261 (64.0)   |
| Current-smoker           | 17 (4.17)    | 17 (4.17)    |

Clinical covariates for the NAS study participants. BMI = body mass index; DNAmAge = DNA methylation age; EEAA = extrinsic epigenetic age acceleration; IEAA = intrinsic epigenetic age acceleration; AAD = age acceleration difference; EEAD = extrinsic epigenetic age acceleration difference; FEV1 = forced expiratory volume in 1 s; FVC = forced vital capacity; FEF25-75 = forced expiratory flow at 25-75% of FVC; COPD = Chronic obstructive pulmonary disease; GOLD = Global Initiative for Chronic Obstructive Lung Disease; GLI = Global Lung Initiative.

**Supplementary Table 2. Associations between epigenetic aging biomarkers and COPD (a) and lung function (b) in KORA.**

| <b>a. COPD</b>                      |                                 |                        |            |            |          |
|-------------------------------------|---------------------------------|------------------------|------------|------------|----------|
|                                     | <b>Epigenetic aging measure</b> | <b>Odds ratio</b>      | <b>LCI</b> | <b>UCI</b> | <b>P</b> |
| COPD                                | AAD                             | 1.00                   | 0.99       | 1.02       | 0.63     |
| COPD                                | EEAD                            | 1.01                   | 1.00       | 1.03       | 0.04     |
| COPD                                | $\Delta$ AAD                    | 1.01                   | 0.98       | 1.03       | 0.62     |
| COPD                                | $\Delta$ EEAD                   | 1.02                   | 1.00       | 1.04       | 0.04     |
| <b>b. Lung function</b>             |                                 |                        |            |            |          |
|                                     | <b>Epigenetic aging measure</b> | <b>Effect estimate</b> | <b>LCI</b> | <b>UCI</b> | <b>P</b> |
| FEV1 (% difference from median)     | AAD                             | -0.43                  | -1.64      | 0.77       | 0.48     |
| FVC (% difference from median)      | AAD                             | -0.17                  | -1.20      | 0.86       | 0.74     |
| FEV1/FCV (% difference from median) | AAD                             | -0.22                  | -0.81      | 0.37       | 0.46     |
| FEF25-75 (% difference from median) | AAD                             | -1.61                  | -4.05      | 0.83       | 0.20     |
| FEV1 (% difference from median)     | EEAD                            | -0.91                  | -1.89      | 0.07       | 0.07     |
| FVC (% difference from median)      | EEAD                            | -0.62                  | -1.45      | 0.22       | 0.15     |
| FEV1/FCV (% difference from median) | EEAD                            | -0.32                  | -0.80      | 0.16       | 0.19     |
| FEF25-75 (% difference from median) | EEAD                            | -1.34                  | -3.32      | 0.65       | 0.19     |
| FEV1 (% difference from median)     | $\Delta$ AAD                    | -0.85                  | -2.41      | 0.71       | 0.29     |
| FVC (% difference from median)      | $\Delta$ AAD                    | -0.65                  | -1.99      | 0.68       | 0.34     |
| FEV1/FCV (% difference from median) | $\Delta$ AAD                    | -0.10                  | -0.86      | 0.66       | 0.80     |
| FEF25-75 (% difference from median) | $\Delta$ AAD                    | -0.85                  | -3.98      | 2.27       | 0.59     |
| FEV1 (% difference from median)     | $\Delta$ EEAD                   | -0.54                  | -1.82      | 0.74       | 0.41     |
| FVC (% difference from median)      | $\Delta$ EEAD                   | -0.10                  | -1.19      | 0.99       | 0.86     |
| FEV1/FCV (% difference from median) | $\Delta$ EEAD                   | -0.54                  | -1.16      | 0.08       | 0.09     |
| FEF25-75 (% difference from median) | $\Delta$ EEAD                   | -1.17                  | -3.74      | 1.39       | 0.37     |

AAD = age acceleration difference;  $\Delta$ AAD = change in age acceleration difference between baseline and follow-up exams; COPD = chronic obstructive pulmonary disease; EEAD = extrinsic epigenetic age acceleration difference;  $\Delta$ EEAD = change in extrinsic epigenetic age acceleration difference between baseline and follow-up exams; FEF25-75 = forced expiratory flow at 25-75% of pulmonary volume; FEV1 = forced expiratory volume in the first second; FVC = forced vital capacity; LCI = lower 95% confidence interval; P = p-value; UCI = upper 95% confidence interval.

**Supplementary Table 3. Associations between epigenetic aging measures and COPD (a) and lung function (b) in NAS.**

| <b>a. COPD</b>          |                                 |                        |            |            |          |
|-------------------------|---------------------------------|------------------------|------------|------------|----------|
|                         | <b>Epigenetic aging measure</b> | <b>Odds ratio</b>      | <b>LCI</b> | <b>UCI</b> | <b>P</b> |
| COPD                    | $\Delta$ EEAD                   | 1.02                   | 1.00       | 1.03       | 0.008044 |
| COPD                    | $\Delta$ AAD                    | 1.02                   | 1.00       | 1.03       | 0.02502  |
| COPD                    | AAD                             | 1.02                   | 1.00       | 1.04       | 0.03089  |
| COPD                    | EEAD                            | 1.01                   | 0.99       | 1.02       | 0.485577 |
| <b>b. Lung function</b> |                                 |                        |            |            |          |
|                         | <b>Epigenetic aging measure</b> | <b>Effect estimate</b> | <b>LCI</b> | <b>UCI</b> | <b>P</b> |
| FEF25-75                | $\Delta$ EEAD                   | -2.55                  | -5.21      | 0.10       | 0.06042  |
| FEF25-75                | $\Delta$ AAD                    | -2.33                  | -5.19      | 0.53       | 0.111603 |
| FEF25-75                | EEAD                            | -2.23                  | -5.50      | 1.04       | 0.182474 |
| FEF25-75                | AAD                             | -0.65                  | -4.20      | 2.89       | 0.717814 |
| FEV1                    | $\Delta$ AAD                    | -1.32                  | -2.79      | 0.15       | 0.07916  |
| FEV1                    | EEAD                            | -1.10                  | -2.75      | 0.56       | 0.194244 |
| FEV1                    | $\Delta$ EEAD                   | -0.73                  | -2.10      | 0.64       | 0.297151 |
| FEV1                    | AAD                             | 0.28                   | -1.51      | 2.07       | 0.761846 |
| FEV1/FVC                | $\Delta$ EEAD                   | -0.79                  | -1.38      | -0.20      | 0.008856 |
| FEV1/FVC                | $\Delta$ AAD                    | -0.79                  | -1.42      | -0.15      | 0.015798 |
| FEV1/FVC                | EEAD                            | -0.59                  | -1.31      | 0.13       | 0.108924 |
| FEV1/FVC                | AAD                             | -0.49                  | -1.27      | 0.30       | 0.223369 |
| FVC                     | AAD                             | 0.96                   | -0.66      | 2.58       | 0.244423 |
| FVC                     | $\Delta$ AAD                    | -0.49                  | -1.83      | 0.85       | 0.47577  |
| FVC                     | EEAD                            | -0.31                  | -1.81      | 1.19       | 0.683633 |
| FVC                     | $\Delta$ EEAD                   | 0.10                   | -1.15      | 1.35       | 0.877678 |

AAD = age acceleration difference;  $\Delta$ AAD = change in age acceleration difference between baseline and follow-up exams; COPD = chronic obstructive pulmonary disease; EEAD = extrinsic epigenetic age acceleration difference;  $\Delta$ EEAD = change in extrinsic epigenetic age acceleration difference between baseline and follow-up exams; FEF25-75 = forced expiratory flow at 25-75% of pulmonary volume; FEV1 = forced expiratory volume in the first second; FVC = forced vital capacity; LCI = lower 95% confidence interval; P = p-value; UCI = upper 95% confidence interval.

**Supplementary Table 4. Meta-analysis of KORA and NAS for COPD (a) and lung function (b) outcomes.**

| <b>a. COPD</b>          |                                 |                        |               |               |          |
|-------------------------|---------------------------------|------------------------|---------------|---------------|----------|
| <b>Outcome</b>          | <b>Epigenetic aging measure</b> | <b>OR</b>              | <b>OR LCI</b> | <b>OR UCI</b> | <b>P</b> |
| COPD                    | EEAD                            | 1.01                   | 1.00          | 1.02          | 0.043004 |
| COPD                    | AAD                             | 1.01                   | 1.00          | 1.02          | 0.06543  |
| COPD                    | $\Delta$ AAD                    | 1.01                   | 1.00          | 1.03          | 0.031643 |
| COPD                    | $\Delta$ EEAD                   | 1.02                   | 1.01          | 1.03          | 0.000706 |
| <b>b. Lung function</b> |                                 |                        |               |               |          |
|                         | <b>Epigenetic aging measure</b> | <b>Effect estimate</b> | <b>LCI</b>    | <b>UCI</b>    | <b>P</b> |
| FEV1                    | AAD                             | -0.21                  | -1.21         | 0.79          | 0.677415 |
| FEV1                    | EEAD                            | -0.96                  | -1.80         | -0.12         | 0.025818 |
| FEV1                    | $\Delta$ AAD                    | -1.10                  | -2.17         | -0.03         | 0.044241 |
| FEV1                    | $\Delta$ EEAD                   | -0.63                  | -1.56         | 0.31          | 0.1883   |
| FVC                     | AAD                             | 0.16                   | -0.71         | 1.02          | 0.72534  |
| FVC                     | EEAD                            | -0.54                  | -1.27         | 0.19          | 0.145254 |
| FVC                     | $\Delta$ AAD                    | -0.57                  | -1.52         | 0.37          | 0.236804 |
| FVC                     | $\Delta$ EEAD                   | -0.01                  | -0.84         | 0.81          | 0.973866 |
| FEV1/FVC                | AAD                             | -0.32                  | -0.79         | 0.15          | 0.185455 |
| FEV1/FVC                | EEAD                            | -0.40                  | -0.80         | -0.01         | 0.046866 |
| FEV1/FVC                | $\Delta$ AAD                    | -0.50                  | -0.99         | -0.02         | 0.04325  |
| FEV1/FVC                | $\Delta$ EEAD                   | -0.67                  | -1.10         | -0.25         | 0.001988 |
| FEF25-75                | AAD                             | -1.30                  | -3.31         | 0.71          | 0.204109 |
| FEF25-75                | EEAD                            | -1.58                  | -3.27         | 0.12          | 0.068706 |
| FEF25-75                | $\Delta$ AAD                    | -1.65                  | -3.76         | 0.46          | 0.124265 |
| FEF25-75                | $\Delta$ EEAD                   | -1.84                  | -3.68         | 0.01          | 0.050812 |

AAD = age acceleration difference;  $\Delta$ AAD = change in age acceleration difference between baseline and follow-up exams; COPD = chronic obstructive pulmonary disease; EEAD = extrinsic epigenetic age acceleration difference;  $\Delta$ EEAD = change in extrinsic epigenetic age acceleration difference between baseline and follow-up exams; FEF25-75 = forced expiratory flow at 25-75% of pulmonary volume; FEV1 = forced expiratory volume in the first second; FVC = forced vital capacity; LCI = lower 95% confidence interval; P = p-value; UCI = upper 95% confidence interval.
